# Supplementary material for: Hyporheic Zone Respiration is Jointly Constrained by Organic Carbon Concentration and Molecular Richness
Source: Copernicus journal article supplement (doi:10.5194/egusphere-2022-613), 2022-08-01
Supplement: Supplementary file 1 [file egusphere-2022-613-supplement.pdf]

# 1 Hyporheic Zone Respiration is Jointly Constrained by Organic 2 Carbon Concentration and Molecular Richness

3 James C. Stegen<sup>1</sup>, Vanessa A. Garayburu-Caruso<sup>1</sup>, Robert E. Danczak<sup>1</sup>, Amy E. Goldman<sup>2</sup>, Lupita  
4 Renteria<sup>1</sup>, Joshua M. Torgeson<sup>2</sup>, and Jacqueline Wells<sup>2</sup>

5 <sup>1</sup>Earth and Biological Sciences Directorate, Pacific Northwest National Laboratory, Richland, WA, U.S.A

6 <sup>2</sup>Energy and Environment Directorate, Pacific Northwest National Laboratory, Richland, WA, U.S.A

7 *Correspondence to:* James C. Stegen (James.Stegen@pnnl.gov)

## 8 Supplementary Materials

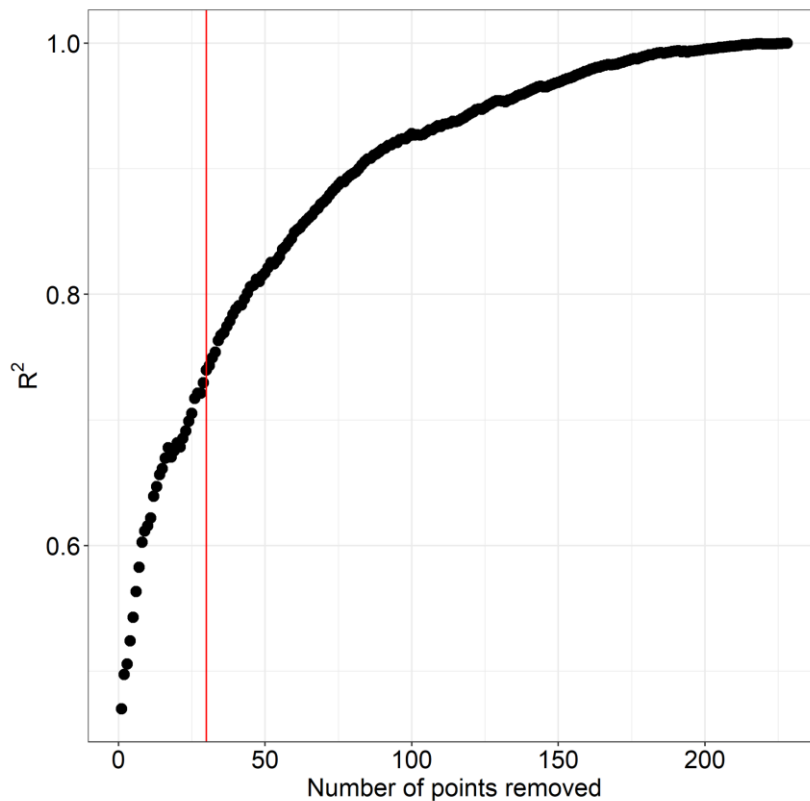

9

10 **Figure S1: Coefficient of determination ( $R^2$ ) of the log-transformed Field NPOC vs. Incubation NPOC**

11 **regression as a function of the number of sample points removed in the regression analysis.** The red line

12 represents the half saturation value and indicates the number of samples to remove to reach an optimal  $R^2$  that

13 balances the number of points (i.e., samples) to remove and the increase in confidence in the NPOC, and thus OM

14 richness, data.

15

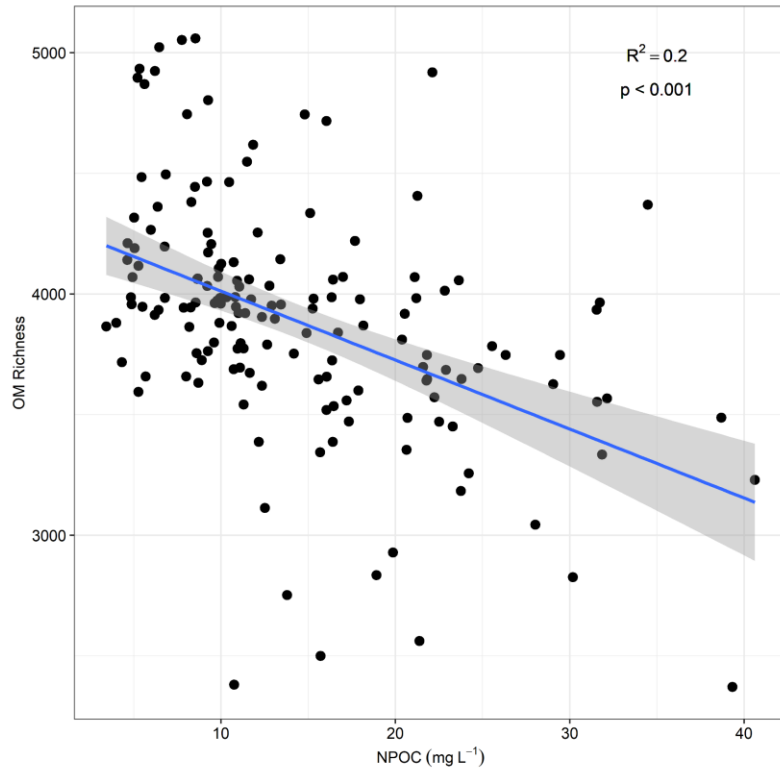

16

17 **Figure S2: OM richness and Non-purgeable organic matter (NPOC) are weakly but significantly related to**  
18 **each other.** Coefficient of determination ( $R^2$ ) and p-value in the plot were calculated via ordinary least-square  
19 regressions. The associated model and its 95% confidence interval are shown as the solid line and gray shading,  
20 respectively.

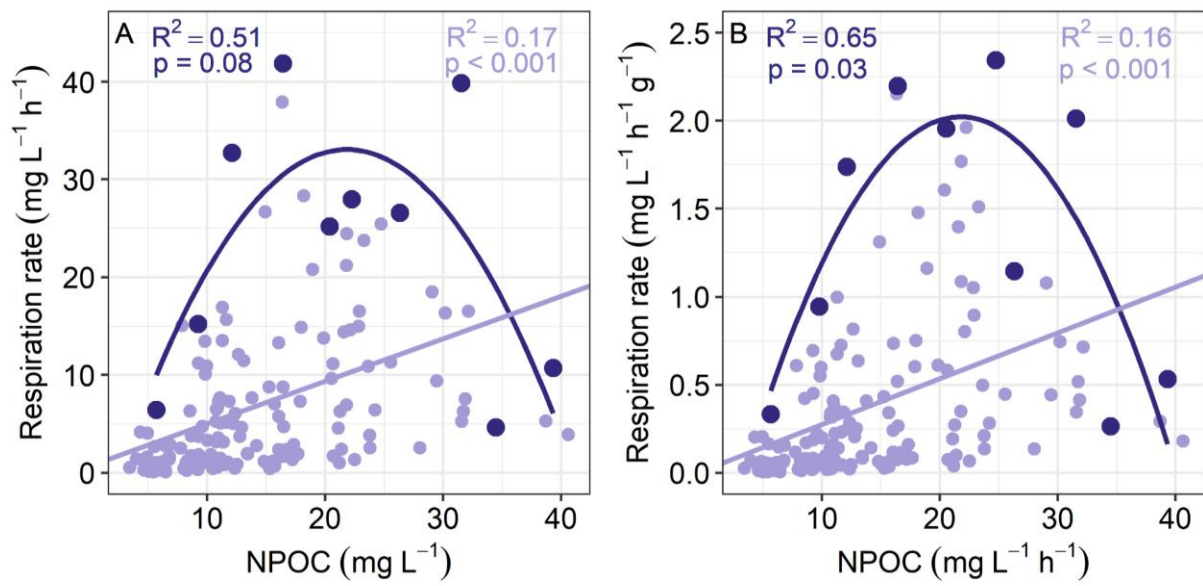

21  
 22 **Figure S3.** Sediment respiration vs non-purgeable organic carbon concentration (NPOC). Panels A and B are for respiration that  
 23 was either not normalized or normalized by sediment mass, respectively. Quadratic regression models with maximum respiration  
 24 rates are shown in dark purple. Linear regression models based on all respiration and NPOC values are shown in light purple.
